# Supplementary material for: Synthesis and characterisation of group 8 tris(1-benzyl-1,2,3-triazol-4-yl)-p-anisolylmethane complexes
Source: Royal Society of Chemistry journal article supplement (doi:10.1039/d2dt02503e), 2022-01-01
Supplement: d2dt02503e1.pdf [file d2dt02503e1.pdf]

Supporting information for  
Synthesis and characterisation of group 8 tris(1-benzyl-1,2,3-triazol-4-yl)-p-  
anisolylmethane complexes

Samuel Francis, Craig R. Rice, Paul A. Scattergood & Paul I. P. Elliott\*

|                                                                                                                                    |     |
|------------------------------------------------------------------------------------------------------------------------------------|-----|
| <b>Fig. S1.</b> $^1\text{H}$ NMR spectrum of ttzm in $\text{CDCl}_3$ .                                                             | S2  |
| <b>Fig. S2.</b> $^{13}\text{C}$ NMR spectrum of ttzm in $\text{CDCl}_3$ .                                                          | S2  |
| <b>Fig. S3.</b> $^1\text{H}$ NMR spectrum of $[\text{Fe}(\text{ttzm})_2](\text{PF}_6)_2$ in $d_3$ -acetonitrile.                   | S3  |
| <b>Fig. S4.</b> $^{13}\text{C}$ NMR spectrum of $[\text{Fe}(\text{ttzm})_2](\text{PF}_6)_2$ in $d_3$ -acetonitrile.                | S3  |
| <b>Fig. S5.</b> $^1\text{H}$ NMR spectrum of $[\text{Ru}(p\text{-cymene})(\text{ttzm})](\text{PF}_6)_2$ in $d_3$ -acetonitrile.    | S4  |
| <b>Fig. S6.</b> $^{13}\text{C}$ NMR spectrum of $[\text{Ru}(p\text{-cymene})(\text{ttzm})](\text{PF}_6)_2$ in $d_3$ -acetonitrile. | S4  |
| <b>Fig. S7.</b> Photophysical and electrochemical characterisation for $[\text{Ru}(p\text{-cymene})(\text{ttzm})](\text{PF}_6)_2$  | S5  |
| <b>Fig. S8.</b> $^1\text{H}$ NMR spectrum of $[\text{Ru}(\text{ttzm})_2](\text{PF}_6)_2$ in $d_3$ -acetonitrile.                   | S6  |
| <b>Fig. S9.</b> $^{13}\text{C}$ NMR spectrum of $[\text{Ru}(\text{ttzm})_2](\text{PF}_6)_2$ in $d_3$ -acetonitrile.                | S6  |
| <b>Fig. S10.</b> $^1\text{H}$ NMR spectrum of $[\text{Os}(\text{ttzm})_2](\text{PF}_6)_2$ in $d_3$ -acetonitrile.                  | S7  |
| <b>Fig. S11.</b> $^{13}\text{C}$ NMR spectrum of $[\text{Os}(\text{ttzm})_2](\text{PF}_6)_2$ in $d_3$ -acetonitrile.               | S7  |
| <b>Fig. S12.</b> DFT optimised geometries of <b>Fe</b> , <b>Ru</b> and <b>Os</b> .                                                 | S8  |
| <b>Fig. S13.</b> Cyclic voltammetry traces for <b>Fe</b> , <b>Ru</b> and <b>Os</b> in acetonitrile.                                | S8  |
| <b>Fig. S14.</b> Plots of selected orbitals for <b>Fe</b> (isosurface 0.02).                                                       | S9  |
| <b>Fig. S15.</b> Plots of selected orbitals for <b>Ru</b> (isosurface 0.02).                                                       | S10 |
| <b>Fig. S16.</b> Plots of selected orbitals for <b>Os</b> (isosurface 0.02).                                                       | S11 |
| <b>Fig. S17.</b> UV-visible absorption spectrum of free ttzm ligand in acetonitrile solution.                                      | S12 |
| <b>Fig. S18.</b> TDDFT Calculated UV-visible absorption spectra for <b>Fe</b> , <b>Ru</b> & <b>Os</b>                              | S13 |
| Optimised ground state geometry for <b>Fe</b>                                                                                      | S14 |
| Optimised ground state geometry for <b>Ru</b>                                                                                      | S16 |
| Optimised ground state geometry for <b>Os</b>                                                                                      | S18 |
| <b>Table S1.</b> Selected TDDFT transitions for <b>Fe</b>                                                                          | S20 |
| <b>Table S2.</b> Selected TDDFT transitions for <b>Ru</b>                                                                          | S21 |
| <b>Table S3.</b> Selected TDDFT transitions for <b>Os</b>                                                                          | S23 |
| <b>Fig. S19.</b> Luminescence excitation profile recorded for <b>Os</b>                                                            | S25 |

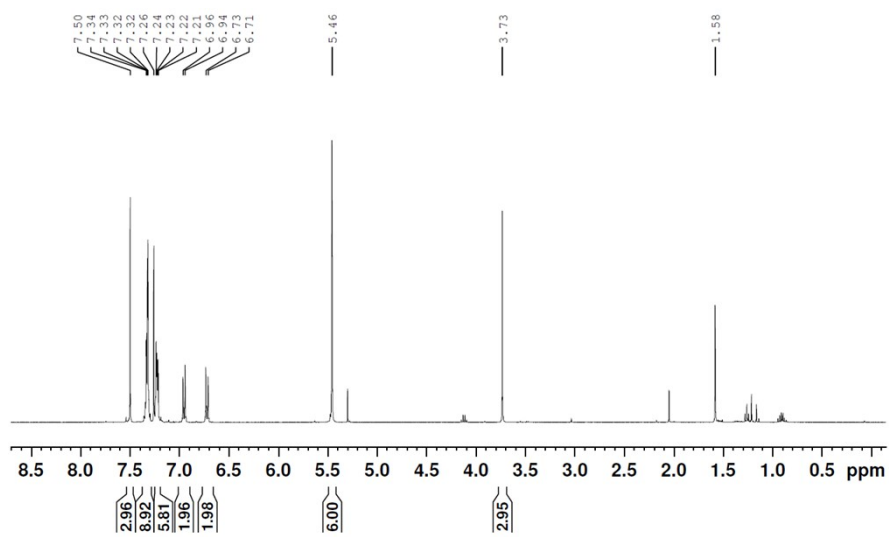

**Fig. S1.**  $^1\text{H}$  NMR spectrum of ttzm in  $\text{CDCl}_3$ .

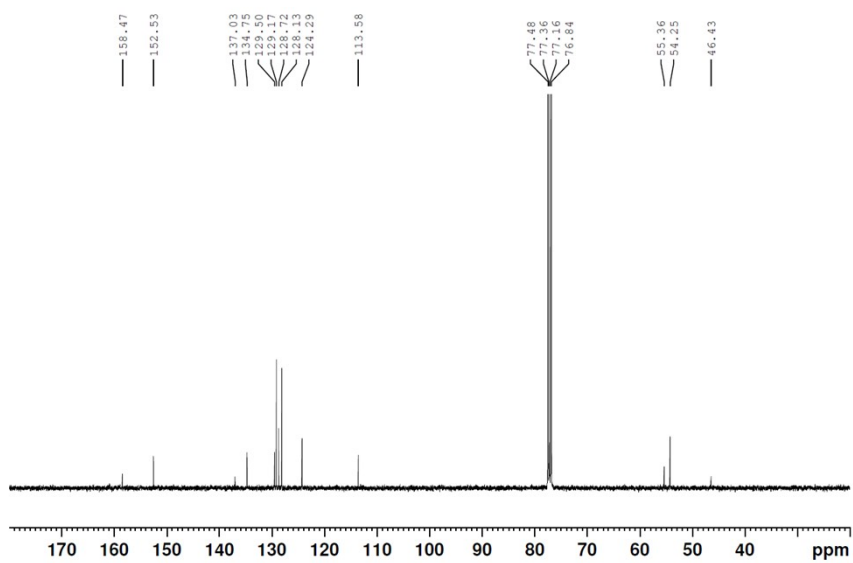

**Fig. S2.**  $^{13}\text{C}$  NMR spectrum of ttzm in  $\text{CDCl}_3$ .

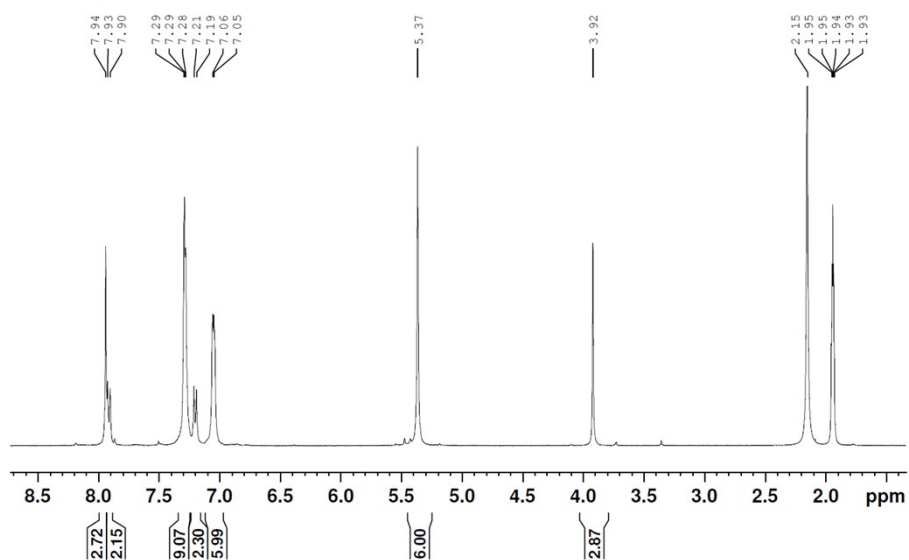

**Fig. S3.**  $^1\text{H}$  NMR spectrum of  $[\text{Fe}(\text{ttm})_2](\text{PF}_6)_2$  in  $\text{d}_3$ -acetonitrile.

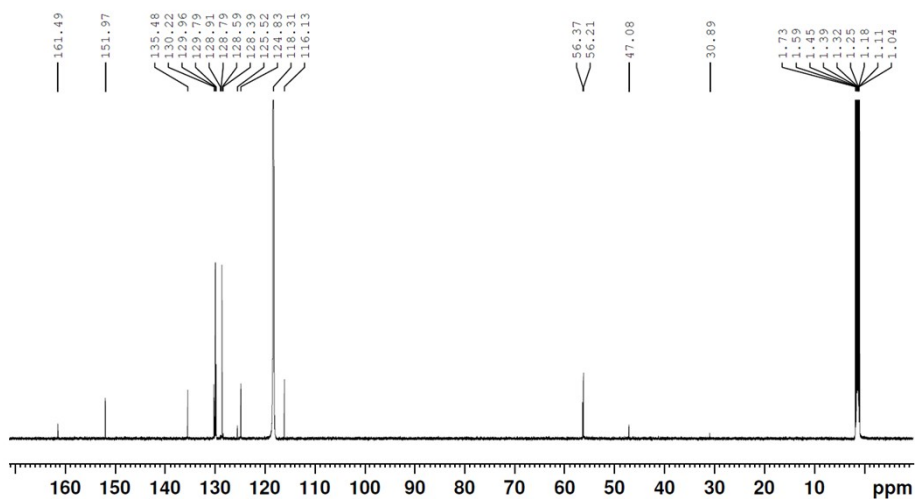

**Fig. S4.**  $^{13}\text{C}$  NMR spectrum of  $[\text{Fe}(\text{ttm})_2](\text{PF}_6)_2$  in  $\text{d}_3$ -acetonitrile.

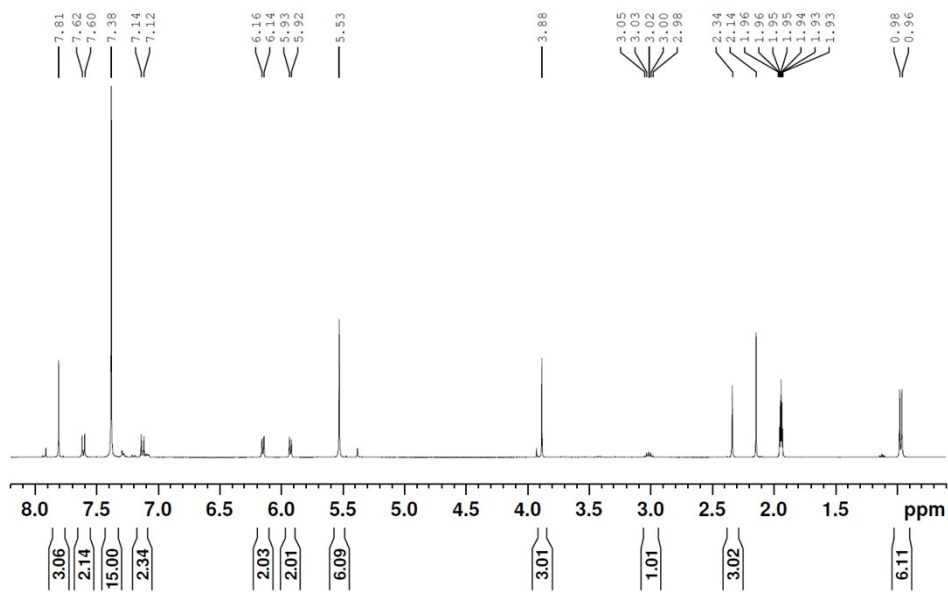

**Fig. S5.**  $^1\text{H}$  NMR spectrum of  $[\text{Ru}(p\text{-cymene})(\text{ttzm})](\text{PF}_6)_2$  in  $\text{d}_3$ -acetonitrile.

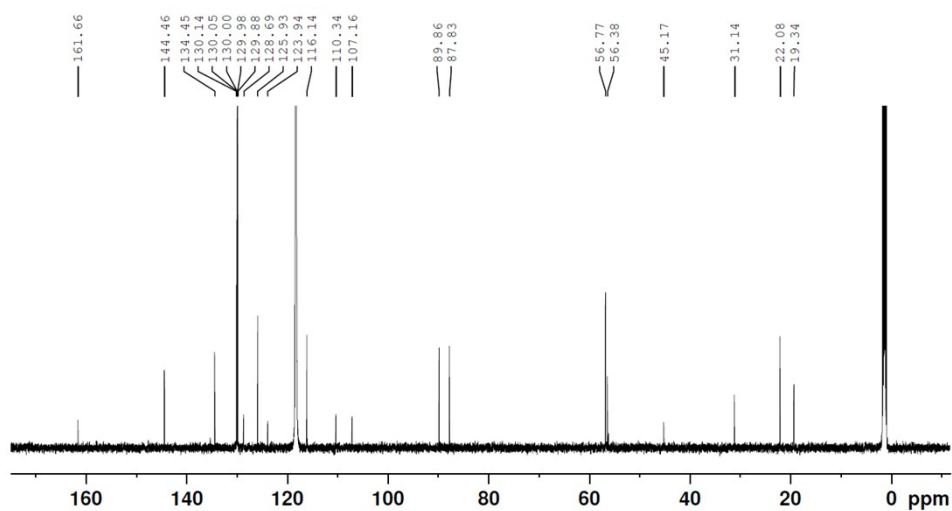

**Fig. S6.**  $^{13}\text{C}$  NMR spectrum of  $[\text{Ru}(p\text{-cymene})(\text{ttzm})](\text{PF}_6)_2$  in  $\text{d}_3$ -acetonitrile.

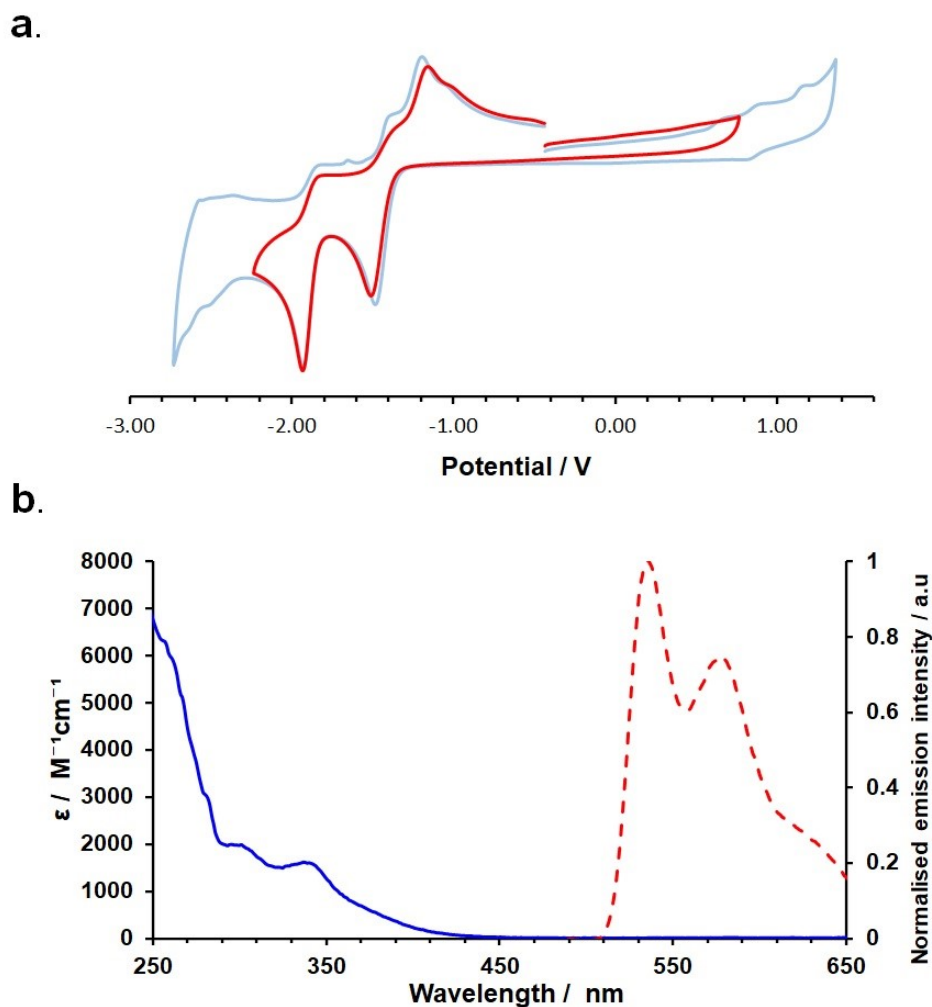

**Fig. S7.** (a) Cyclic voltammograms recorded for  $[\text{Ru}(p\text{-cymene})(\text{ttzm})](\text{PF}_6)_2$  at  $100 \text{ mVs}^{-1}$  in MeCN. (b) UV-Visible electronic absorption spectrum recorded for an MeCN solution of  $[\text{Ru}(p\text{-cymene})(\text{ttzm})](\text{PF}_6)_2$  at room temperature (blue, solid line) and 77 K luminescence spectrum recorded for  $[\text{Ru}(p\text{-cymene})(\text{ttzm})](\text{PF}_6)_2$  in a 4:1 EtOH/MeOH glass ( $\lambda_{\text{ex}} = 340 \text{ nm}$ ) (red, dashed line).

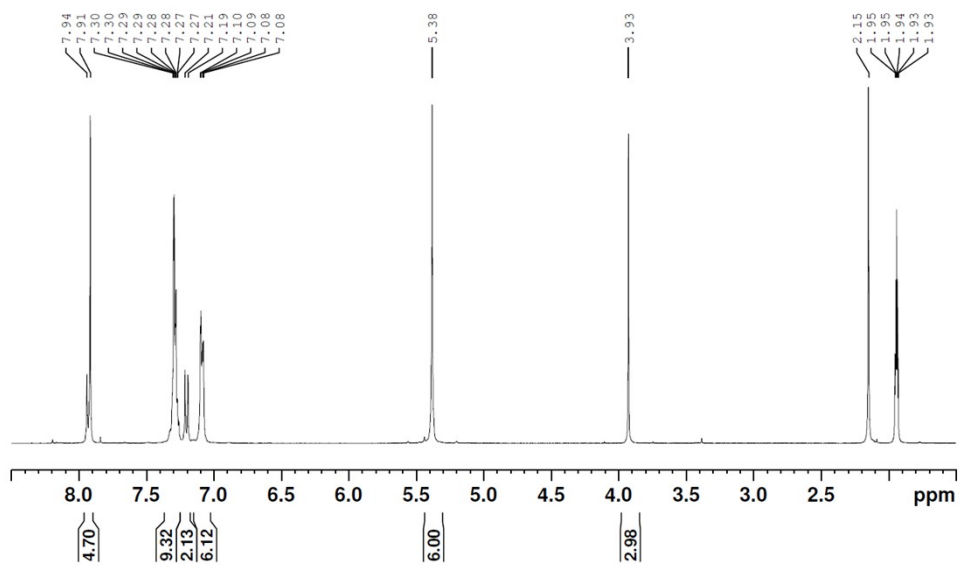

**Fig. S8.**  $^1\text{H}$  NMR spectrum of  $[\text{Ru}(\text{tzm})_2](\text{PF}_6)_2$  in  $\text{d}_3$ -acetonitrile.

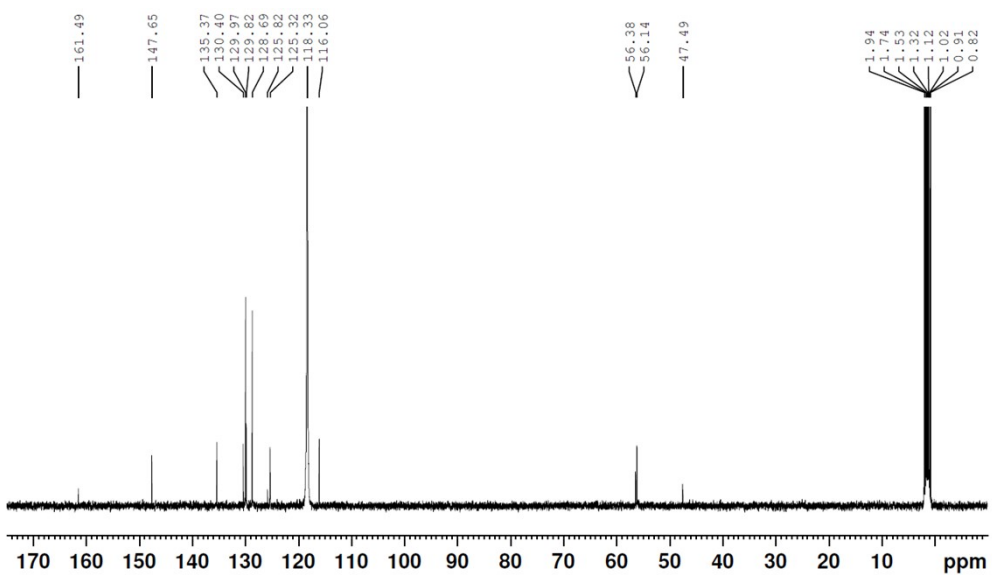

**Fig. S9.**  $^{13}\text{C}$  NMR spectrum of  $[\text{Ru}(\text{tzm})_2](\text{PF}_6)_2$  in  $\text{d}_3$ -acetonitrile.

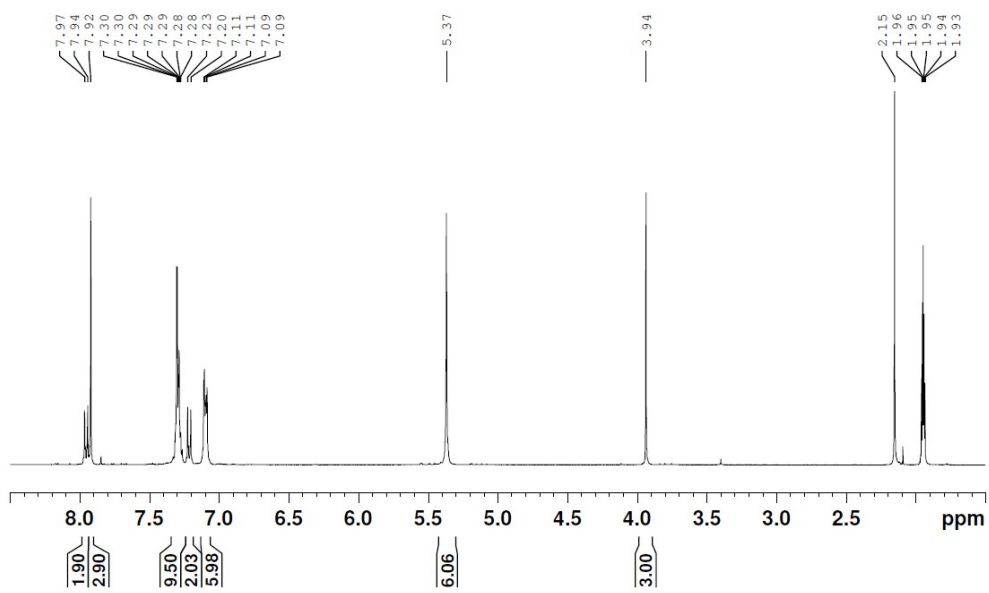

**Fig. S10.**  $^1\text{H}$  NMR spectrum of  $[\text{Os}(\text{ttzm})_2](\text{PF}_6)_2$  in  $\text{d}_3$ -acetonitrile.

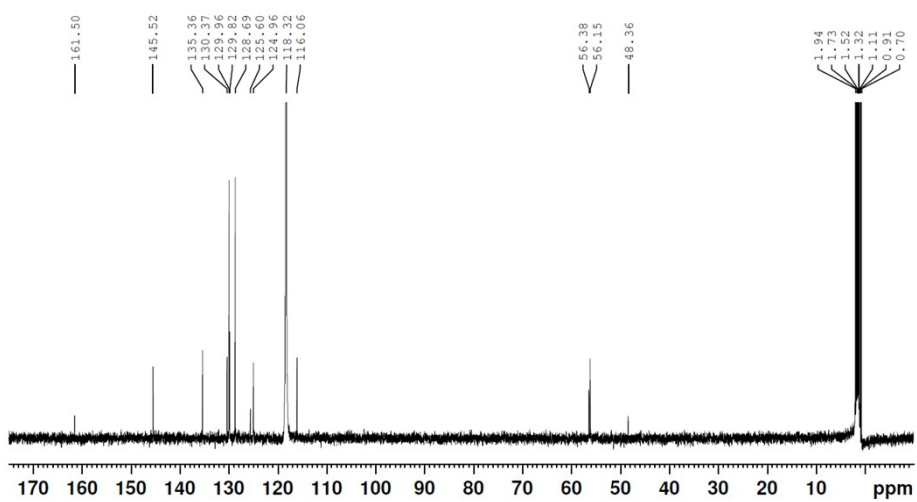

**Fig. S11.**  $^{13}\text{C}$  NMR spectrum of  $[\text{Os}(\text{ttzm})_2](\text{PF}_6)_2$  in  $\text{d}_3$ -acetonitrile.

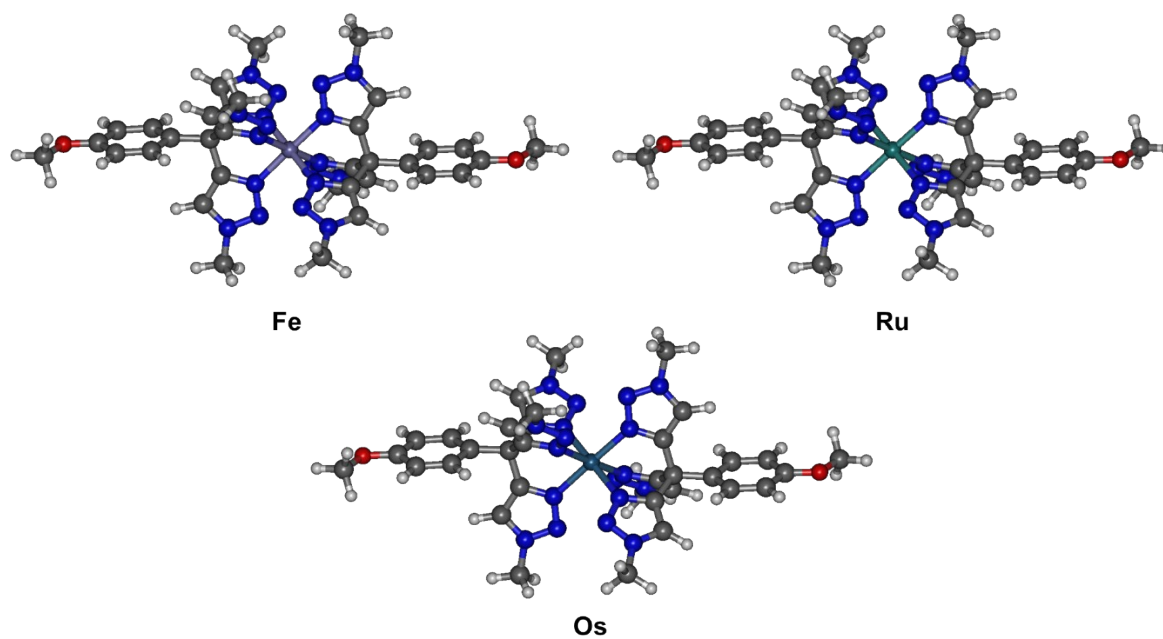

**Fig. S12.** Optimised ground state geometries of **Fe**, **Ru** and **Os** (benzyl substituents replaced by methyl).

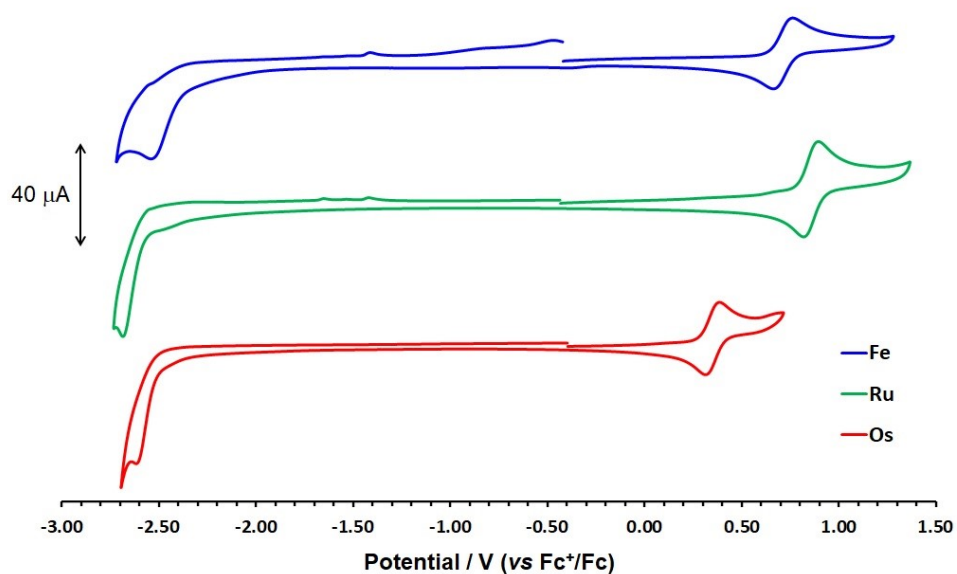

**Fig. S13.** Cyclic voltammetry traces for **Fe**, **Ru** and **Os** in acetonitrile recorded at  $100 \text{ mVs}^{-1}$  (calibrated against the Fc/Fc<sup>+</sup> couple for E = 0.0 V).



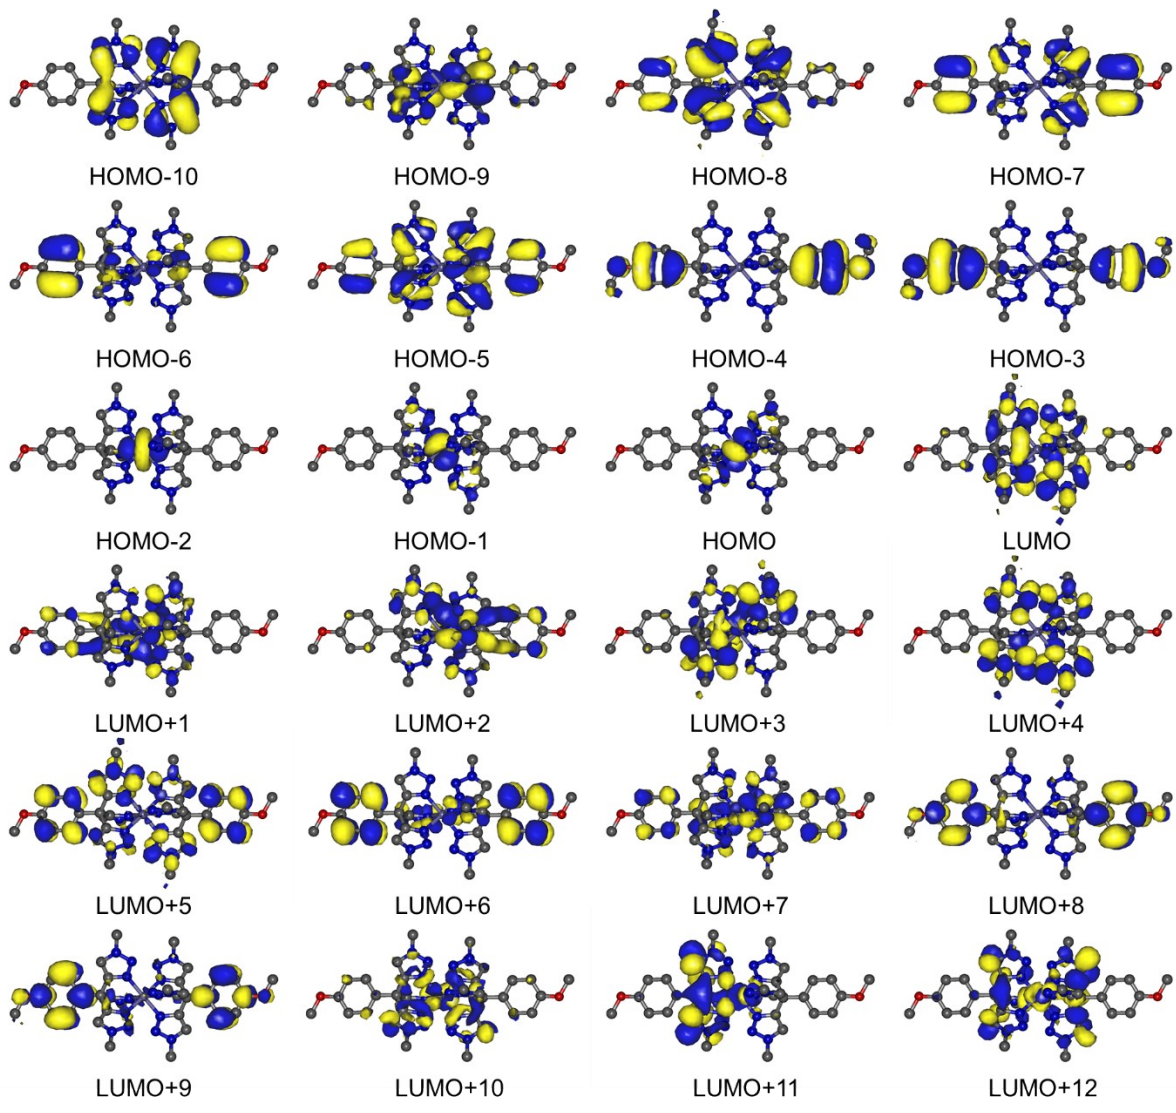

**Fig. S14.** Plots of selected orbitals for Fe (isosurface 0.02).

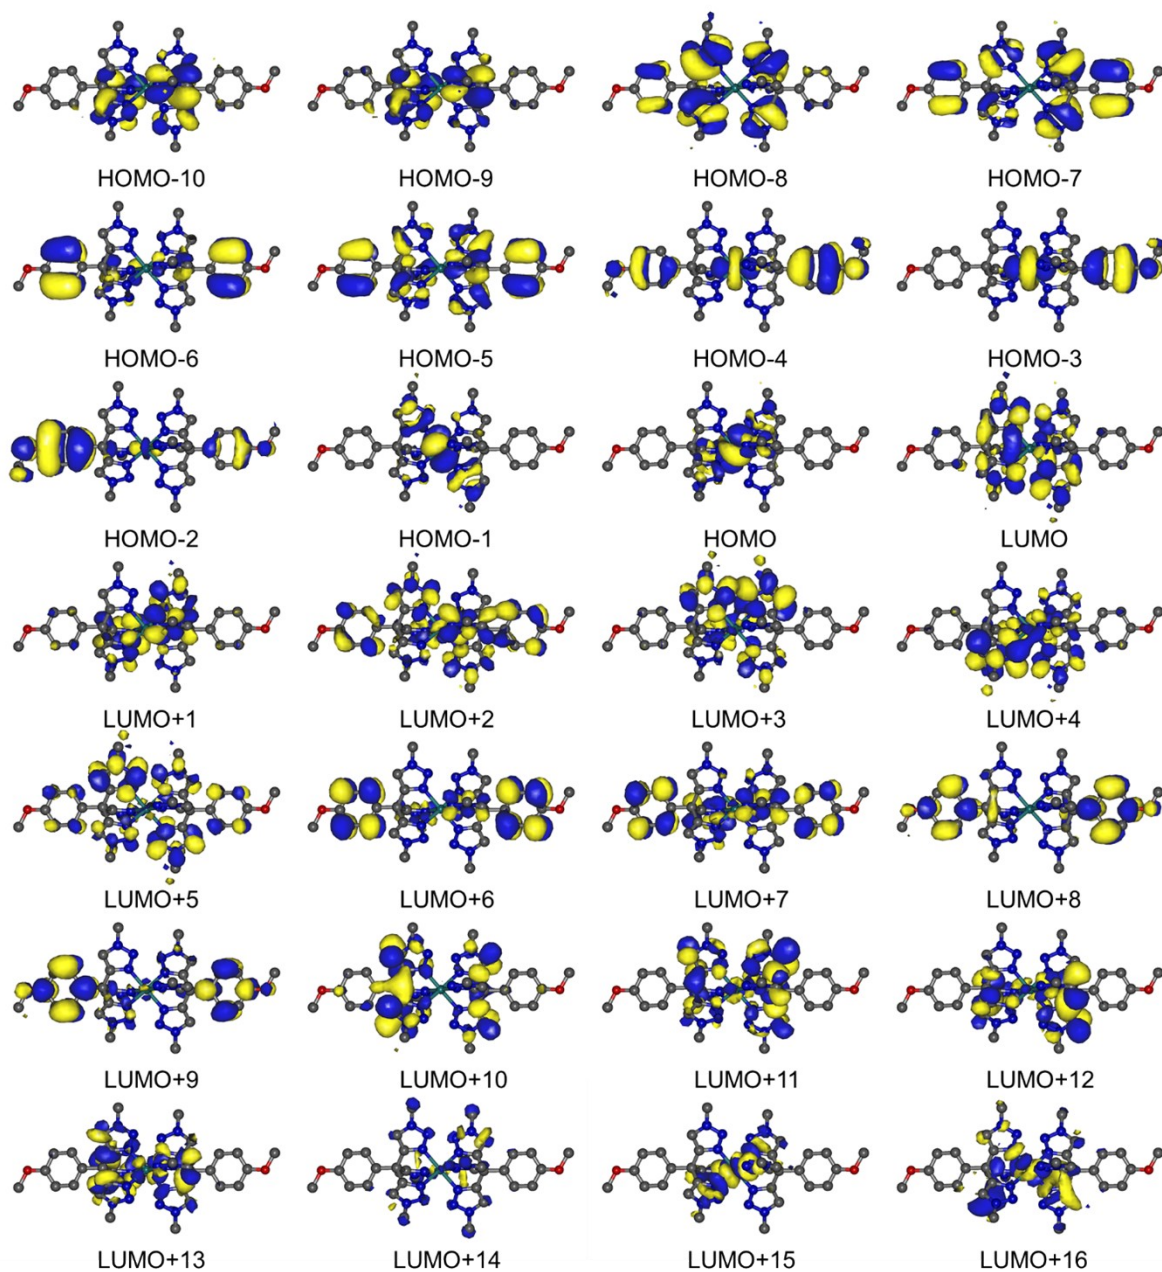

**Fig. S15.** Plots of selected orbitals for **Ru** (isosurface 0.02).

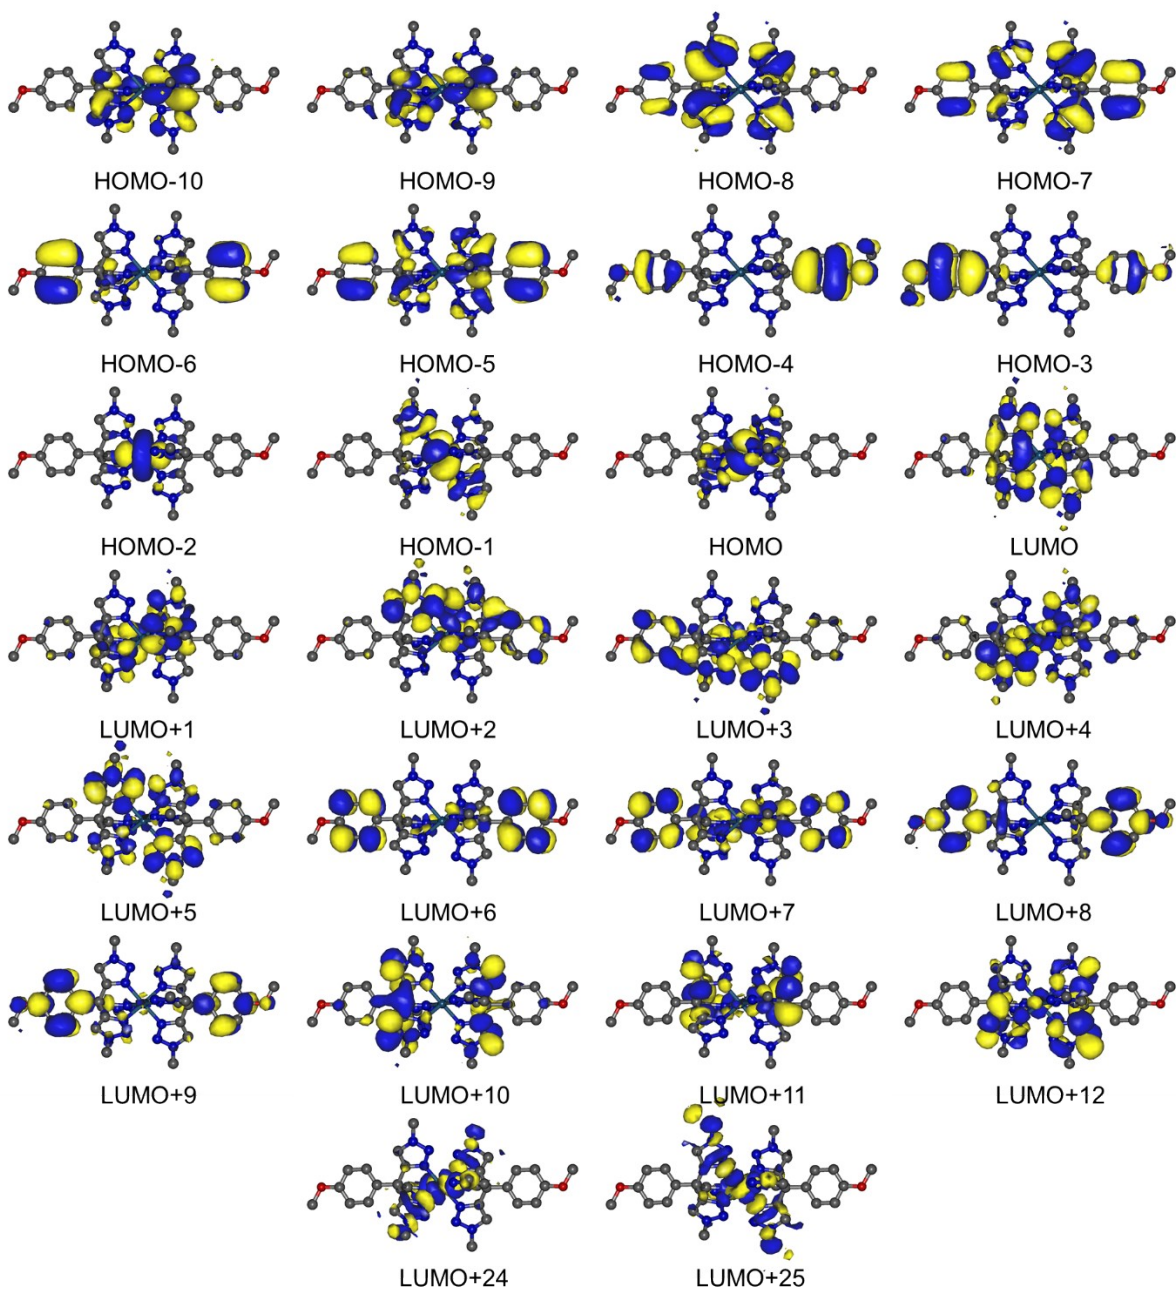

**Fig. S16.** Plots of selected orbitals for **Os** (isosurface 0.02).

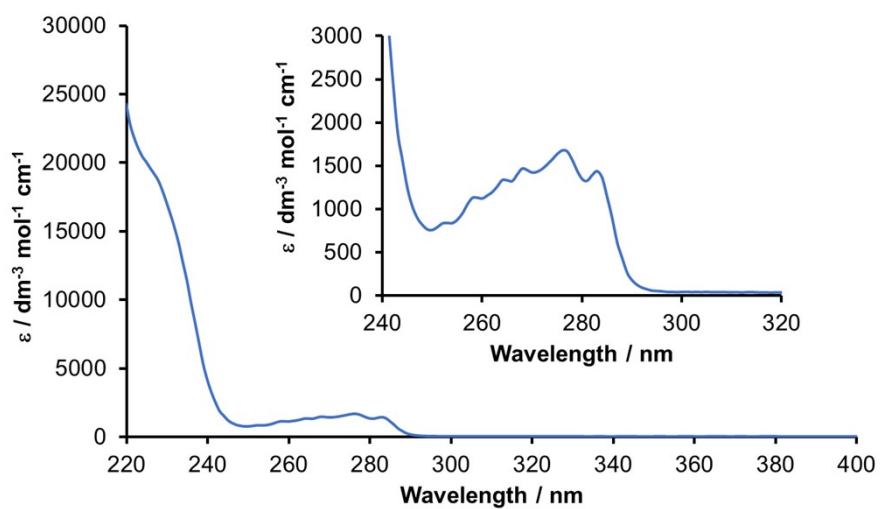

**Fig. S17.** UV-visible absorption spectrum of free ttzm ligand in acetonitrile solution (inset: zoom of the region containing structured band apparent in spectra of complexes).



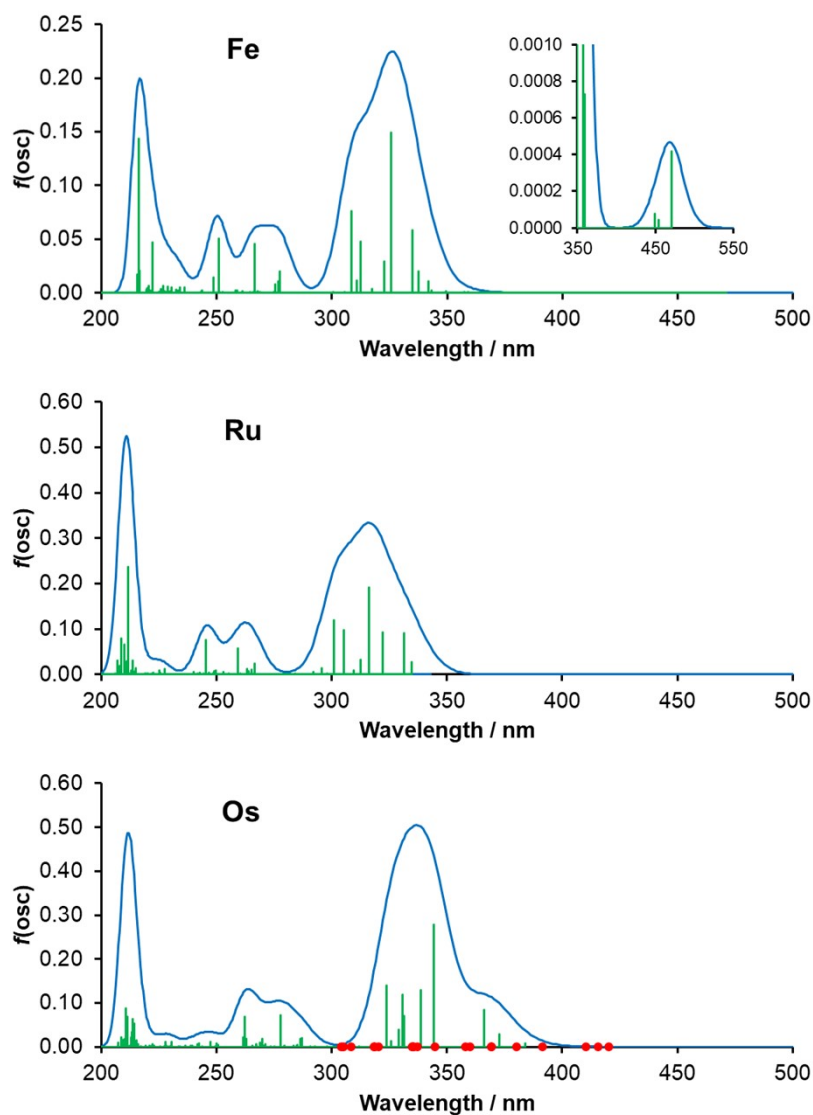

**Fig. S18.** TDDFT Calculated UV-visible absorption spectra for **Fe**, **Ru** & **Os**: positions of vertical excitations (green peaks) with Gaussian convolution (blue trace, FWHM = 0.1 eV). Red markers in the spectrum for **Os** show positions of spin-forbidden excitations of lowest 20 triplet states.

## Optimised ground state geometry for Fe

93

Coordinates from ORCA-job gs

|    |                   |                   |                   |
|----|-------------------|-------------------|-------------------|
| Fe | -0.00717886298096 | 0.01297821631572  | 0.00166292753086  |
| N  | -2.79351777722659 | 0.15714837815121  | -2.90344876482949 |
| N  | -2.44131263323053 | -0.05348513390114 | -1.63649283505974 |
| N  | -1.16018532439425 | 0.21022911458127  | -1.57053045179051 |
| N  | 0.77217252960633  | 1.73515257508326  | -0.49901201613591 |
| N  | 1.06605649634793  | 2.76493781042508  | 0.25427600690221  |
| N  | 1.56663934783035  | 3.69156053366668  | -0.56677837658592 |
| N  | 1.30602941811975  | -0.79757522349990 | -1.20625657096351 |
| N  | 1.92692751885305  | -1.93289783842244 | -1.00982109403041 |
| N  | 2.53701782290738  | -2.22208581458532 | -2.15643696337641 |
| O  | 2.48230209975996  | 3.47336747471640  | -7.69345255182851 |
| C  | -1.74137542447348 | 0.55118818156045  | -3.65605836209214 |
| H  | -1.83720038100798 | 0.75201148861173  | -4.70791294850125 |
| C  | -0.68007229767648 | 0.59952607006432  | -2.78231908103959 |
| C  | 0.80238410589684  | 0.94667080373044  | -2.87855324595147 |
| C  | 1.07851022418148  | 1.98631051426035  | -1.79873339272780 |
| C  | 1.59476547199112  | 3.25860629952177  | -1.84789596117277 |
| H  | 1.96238918907653  | 3.86592445479076  | -2.65637009472219 |
| C  | 1.98108537858298  | 4.98549678345220  | -0.04328075158592 |
| H  | 2.40564872052325  | 5.56294403199750  | -0.86156975817403 |
| H  | 2.73104408474855  | 4.83776305813974  | 0.73272635240370  |
| C  | 1.52213839619714  | -0.33574775310525 | -2.47130508329389 |
| C  | 2.31442473599977  | -1.27309761748264 | -3.09442444685216 |
| H  | 2.71641797831999  | -1.35524086623791 | -4.08796288062237 |
| C  | 3.33832314852149  | -3.43234867236242 | -2.26515009186329 |
| H  | 3.59058719189076  | -3.58472385045280 | -3.31185791510547 |
| H  | 2.75453459870902  | -4.27427252805081 | -1.89564215360561 |
| C  | 1.20967583361946  | 1.54217606669667  | -4.22160184044903 |
| C  | 2.49095662799513  | 1.36289743438812  | -4.75009899617643 |
| H  | 3.21129333143325  | 0.73435280783100  | -4.24600413789809 |
| C  | 2.88710430586740  | 2.00988075475039  | -5.90893271730580 |
| H  | 3.88152746630255  | 1.85453887812563  | -6.31117981509796 |
| C  | 2.01291200473675  | 2.87888927646961  | -6.56775356368446 |
| C  | 0.74147404851559  | 3.09590298267701  | -6.03501882080208 |
| H  | 0.04739200317236  | 3.77929488153234  | -6.50469179690915 |
| C  | 0.36245485083163  | 2.43949438715785  | -4.86977101810179 |
| H  | -0.61092600143996 | 2.66848053388703  | -4.45728802535014 |
| C  | 1.58600462673527  | 4.32500572903672  | -8.41682599903488 |
| H  | 0.71367810378544  | 3.76507171585142  | -8.76652951644201 |
| H  | 2.15109063832468  | 4.69352431483093  | -9.27146649712635 |
| H  | 1.25985543230895  | 5.17110107537394  | -7.80480628728427 |
| C  | -4.18465592632978 | 0.01280839812728  | -3.30357545203882 |
| H  | -4.25897747704367 | 0.23524297533686  | -4.36601498469689 |
| H  | -4.79617554095712 | 0.71309541985878  | -2.73610985565880 |
| N  | 2.61406110667599  | 0.10341689017627  | 3.07726035485262  |
| N  | 2.35326033471552  | 0.21802033142630  | 1.77434212197050  |
| N  | 1.10963257303812  | -0.16491389848157 | 1.61746281372769  |
| N  | -0.78419325853868 | -1.71321104781589 | 0.46669438488594  |
| N  | -1.06717814628720 | -2.72301428914683 | -0.31715832863409 |
| N  | -1.59165555462292 | -3.66425611003679 | 0.47081444759071  |
| N  | -1.34860307548840 | 0.81129048977792  | 1.18895595354887  |
| N  | -1.98934633343717 | 1.93083837124912  | 0.97344447265085  |
| N  | -2.69173435719895 | 2.17180010018845  | 2.07705199331629  |
| O  | -2.58684503737872 | -3.59743303043476 | 7.59314188106054  |
| C  | 1.54142350086484  | -0.35690103563903 | 3.76039153199531  |
| H  | 1.56117676621076  | -0.50100847040318 | 4.82628553016124  |

|   |                   |                   |                   |
|---|-------------------|-------------------|-------------------|
| C | 0.56928096914731  | -0.54569381596281 | 2.80801468843877  |
| C | -0.89943767197992 | -0.95535190202928 | 2.84564667731557  |
| C | -1.12149123889998 | -1.98958060609742 | 1.75131378180184  |
| C | -1.64713797267243 | -3.25962992629001 | 1.76069469077077  |
| H | -2.03838091664951 | -3.88236208821601 | 2.54602339841356  |
| C | -2.00220479545144 | -4.94196983503524 | -0.09464592494262 |
| H | -2.46240539371830 | -5.53180838616469 | 0.69494311934975  |
| H | -1.12948653905865 | -5.46263290557786 | -0.48881183619422 |
| C | -1.63954949666329 | 0.31196872689894  | 2.42484427054905  |
| C | -2.50842726541682 | 1.20659718551687  | 3.00739438817165  |
| H | -2.98676882667195 | 1.25174304553003  | 3.96894919727740  |
| C | -3.55787948040265 | 3.33924384165910  | 2.14100362793032  |
| H | -4.45294921165265 | 3.16273479683578  | 1.54399199039615  |
| H | -3.83321218949677 | 3.50945033993712  | 3.17907710984741  |
| C | -1.31820146962760 | -1.57851495668055 | 4.17166455062781  |
| C | -2.61288080110127 | -1.44540326693675 | 4.67901160274035  |
| H | -3.34352261350270 | -0.83247248279215 | 4.17043140956257  |
| C | -3.00843355478434 | -2.12164134775665 | 5.82177044271255  |
| H | -4.01406756920156 | -2.00360718493924 | 6.20864276164821  |
| C | -2.11905824251247 | -2.97373572644849 | 6.48241176961544  |
| C | -0.83269220677729 | -3.14478515398546 | 5.96838015488662  |
| H | -0.12625094588600 | -3.81380010771443 | 6.44019997910990  |
| C | -0.45397361555172 | -2.45897355587012 | 4.82058742857732  |
| H | 0.53521148985453  | -2.64524449772725 | 4.42292869194750  |
| C | -1.68247907598474 | -4.45077756013431 | 8.30468681907695  |
| H | -0.82443015717048 | -3.88434443216792 | 8.67820828512845  |
| H | -2.25001904580390 | -4.85180989401760 | 9.14290776402091  |
| H | -1.33436029589387 | -5.27466458567850 | 7.67456222203281  |
| C | 3.93418765026637  | 0.42551380294964  | 3.60047913036433  |
| H | 4.50537063910962  | 0.88993400595868  | 2.79957643253170  |
| H | 4.42898332301997  | -0.48552772964709 | 3.93715833569575  |
| H | 1.11561736122550  | 5.50363774709869  | 0.36973882238634  |
| H | 4.24908261762258  | -3.32201534774186 | -1.67672820921304 |
| H | -4.51320347302615 | -1.00815562084001 | -3.10961954364390 |
| H | -2.72180442401461 | -4.76656187820748 | -0.89327170130088 |
| H | -3.01372733065816 | 4.19868884946958  | 1.75276017575163  |
| H | 3.83024618650075  | 1.11998968004489  | 4.43332296761936  |

## Optimised ground state geometry for Ru

93

Coordinates from ORCA-job gs

|    |                   |                   |                   |
|----|-------------------|-------------------|-------------------|
| Ru | 0.00075239154264  | 0.00035972032611  | -0.00001392487812 |
| N  | -2.78032569179895 | 0.23542827877170  | -3.02203822649033 |
| N  | -2.45276262606423 | -0.00608561058574 | -1.75580538931798 |
| N  | -1.16629989073675 | 0.22001263611821  | -1.66938543674855 |
| N  | 0.82272721943584  | 1.78828905626248  | -0.57417659467922 |
| N  | 1.11788101918753  | 2.83913711669273  | 0.14791028191916  |
| N  | 1.61254289528026  | 3.74119954031510  | -0.70184543330052 |
| N  | 1.35904980662372  | -0.82823799156488 | -1.29794661283138 |
| N  | 1.96914057367080  | -1.97389287308560 | -1.13422841670787 |
| N  | 2.54659918153484  | -2.25145026598570 | -2.29823301679597 |
| O  | 2.52607218269250  | 3.51400793625000  | -7.74305656256356 |
| C  | -1.70847494462038 | 0.60772199881939  | -3.75304010212667 |
| H  | -1.78497561484973 | 0.82607102783631  | -4.80107675729243 |
| C  | -0.65592425127016 | 0.61502801815149  | -2.86822244303887 |
| C  | 0.83383106767950  | 0.94682067431643  | -2.95177036886173 |
| C  | 1.12190269799337  | 2.00030927913574  | -1.88364665438687 |
| C  | 1.63463203371810  | 3.27198078330372  | -1.96739091921810 |
| H  | 1.99676261486700  | 3.85713242648453  | -2.79216327267433 |
| C  | 2.02885435385075  | 5.05069189614235  | -0.21815766426744 |
| H  | 2.44405410558500  | 5.60477811215755  | -1.05512687491775 |
| H  | 2.78537672408698  | 4.92620207806766  | 0.55333822344606  |
| C  | 1.55028389193242  | -0.34604838212632 | -2.56107124602397 |
| C  | 2.31394977692602  | -1.28654438338739 | -3.21416743536145 |
| H  | 2.68947902093840  | -1.36054725405727 | -4.21683305325972 |
| C  | 3.31649684702168  | -3.47878122389665 | -2.44584964606434 |
| H  | 3.57545153171512  | -3.59781865265824 | -3.49365784555196 |
| H  | 2.70666591363345  | -4.31623594494871 | -2.11434058928163 |
| C  | 1.24275805126960  | 1.54624374490282  | -4.29644159212720 |
| C  | 2.51605059754646  | 1.35428250593439  | -4.83674391081997 |
| H  | 3.22970301384228  | 0.70922905628194  | -4.34863571204847 |
| C  | 2.91502268392750  | 2.01185713254305  | -5.98818819747301 |
| H  | 3.90250173631118  | 1.84479000216855  | -6.39824254104224 |
| C  | 2.05371757211579  | 2.90683662440588  | -6.62638527410467 |
| C  | 0.79082871708411  | 3.13631915099483  | -6.08171190943594 |
| H  | 0.10637594445078  | 3.83878739221162  | -6.53301116175873 |
| C  | 0.40938481475942  | 2.46932648298441  | -4.92462183897786 |
| H  | -0.55320395729941 | 2.71360237238348  | -4.50106220135533 |
| C  | 1.63738076997216  | 4.38313551316099  | -8.45282105076768 |
| H  | 0.76391177911726  | 3.83475071460716  | -8.81257957498950 |
| H  | 2.20558411974793  | 4.76263535417616  | -9.29859115298246 |
| H  | 1.31533034431267  | 5.21958959336586  | -7.82858346659270 |
| C  | -4.17302813022573 | 0.15762553803047  | -3.43542171028525 |
| H  | -4.22836075527078 | 0.39503272243467  | -4.49421859885475 |
| H  | -4.75549280010541 | 0.87767458686363  | -2.86520284602413 |
| N  | 2.55311317917666  | 0.13942794386391  | 3.24787501179722  |
| N  | 2.35038513261353  | 0.22917743821108  | 1.93449621478373  |
| N  | 1.12014818130686  | -0.17402339172778 | 1.72928403476560  |
| N  | -0.81569235747648 | -1.79213783870909 | 0.53736286596533  |
| N  | -1.09312845748505 | -2.82553675461639 | -0.21595488385617 |
| N  | -1.60799129715729 | -3.74576335082237 | 0.60096596758580  |
| N  | -1.40726309865328 | 0.80501896146513  | 1.25852915394811  |
| N  | -2.06267647695046 | 1.91675200083998  | 1.05260162387229  |
| N  | -2.76775619823378 | 2.13659396038606  | 2.15624241779730  |
| O  | -2.53097695017238 | -3.64406209121223 | 7.67767452921991  |
| C  | 1.45946876408414  | -0.32507774165745 | 3.88889785304243  |
| H  | 1.43365748837751  | -0.45266325544214 | 4.95505802495764  |



|   |                   |                   |                   |
|---|-------------------|-------------------|-------------------|
| C | 0.53164384968982  | -0.54503498018588 | 2.90100956984962  |
| C | -0.93493478420056 | -0.97416127856264 | 2.91122945884425  |
| C | -1.14668862032965 | -2.03093152296809 | 1.83233571361712  |
| C | -1.66227867145915 | -3.30406545591153 | 1.87610441628882  |
| H | -2.04613902702961 | -3.90693526712068 | 2.67799615378267  |
| C | -2.01239337749448 | -5.04291000561308 | 0.07480942439704  |
| H | -2.45290199865705 | -5.61618133423902 | 0.88541013152286  |
| H | -1.14095999370138 | -5.56189743983320 | -0.31997472880128 |
| C | -1.69203714990876 | 0.28631296566406  | 2.49024913927203  |
| C | -2.57238960992077 | 1.16711199752757  | 3.07626725836495  |
| H | -3.05116465768135 | 1.20211304110695  | 4.03594823442209  |
| C | -3.64882835113727 | 3.29256217387742  | 2.22708463810092  |
| H | -4.53560319489189 | 3.11052563137362  | 1.62233296990943  |
| H | -3.93359738778872 | 3.44784229659647  | 3.26331966671431  |
| C | -1.34018921475856 | -1.60271110163239 | 4.24286700615701  |
| C | -2.61540744671114 | -1.45819827455624 | 4.79013765926922  |
| H | -3.35400519911112 | -0.83357963001148 | 4.31303800903847  |
| C | -2.98459051934152 | -2.14128735592763 | 5.93782505832724  |
| H | -3.97481887199102 | -2.01265634186762 | 6.35511929769043  |
| C | -2.08983654178940 | -3.01359571992244 | 6.56089316262090  |
| C | -0.82348646665799 | -3.19681719438990 | 6.00563005272080  |
| H | -0.11325963592606 | -3.88016634567831 | 6.44619462384033  |
| C | -0.47140321022627 | -2.50407342675316 | 4.85533513285221  |
| H | 0.50116566385123  | -2.69959282181457 | 4.42656526410728  |
| C | -1.61895183968525 | -4.51749790522599 | 8.35167979643898  |
| H | -0.74838103478512 | -3.96607053233900 | 8.71347078754411  |
| H | -2.16951898027920 | -4.92790913162814 | 9.19467685961390  |
| H | -1.29387342185543 | -5.33233053993239 | 7.70072643164236  |
| C | 3.84766162480938  | 0.47818710926810  | 3.82400343892366  |
| H | 4.44183580877951  | 0.95585997249763  | 3.05028448271503  |
| H | 4.34125411863937  | -0.42627891525216 | 4.17476820101569  |
| H | 1.16708968188179  | 5.57641383434910  | 0.18883747620748  |
| H | 4.22160739587894  | -3.41535832262694 | -1.84533657288626 |
| H | -4.54739658342966 | -0.84800664380452 | -3.25371861976911 |
| H | -2.74557224886930 | -4.89744762219089 | -0.71534971858019 |
| H | -3.11238450373727 | 4.16054063961755  | 1.85174874553464  |
| H | 3.70002217826334  | 1.16443673422586  | 4.65457408472725  |

## Optimised ground state geometry for Os

93

Coordinates from ORCA-job gs

|    |                  |                   |                   |
|----|------------------|-------------------|-------------------|
| Os | 5.18140448358479 | 5.74554447693820  | 6.41516379790128  |
| N  | 2.40278656765023 | 5.99279528048573  | 3.38043481766428  |
| N  | 2.72718407000228 | 5.74667283992961  | 4.64673895509539  |
| N  | 4.01807194817231 | 5.96939279851743  | 4.73459844742403  |
| N  | 6.00805694837738 | 7.53566371823649  | 5.82813149935141  |
| N  | 6.30536065240028 | 8.58913892802151  | 6.55225083216526  |
| N  | 6.80198735408270 | 9.48890992684926  | 5.70074947764808  |
| N  | 6.53740740205158 | 4.91673016664322  | 5.10320737845990  |
| N  | 7.15503706971468 | 3.77100702776744  | 5.26744090256831  |
| N  | 7.73848577799662 | 3.50100192982881  | 4.10456082454107  |
| O  | 7.70983834558878 | 9.26365423048310  | -1.34308857965827 |
| C  | 3.47529675291337 | 6.36332449852239  | 2.65065460861923  |
| H  | 3.39898322312126 | 6.58413441374216  | 1.60311993570637  |
| C  | 4.52920100366539 | 6.36655456767052  | 3.53328817638464  |
| C  | 6.01915023514535 | 6.69631146751175  | 3.44912508538045  |
| C  | 6.30914708335061 | 7.74971159176281  | 4.51646529827220  |
| C  | 6.82433348403927 | 9.01988577548644  | 4.43556606379090  |
| H  | 7.18803123799523 | 9.60483128538116  | 3.61129381636878  |
| C  | 7.21974881105021 | 10.79778420053487 | 6.18399256448456  |
| H  | 7.63288867033582 | 11.35228115584354 | 5.34626301298758  |
| H  | 7.97818697501007 | 10.67304850284244 | 6.95367810691424  |
| C  | 6.73583717929221 | 5.40372663997982  | 3.83955971531233  |
| C  | 7.50630739681912 | 4.46677064394268  | 3.19026679126898  |
| H  | 7.88746386479039 | 4.39606531657670  | 2.18953007077910  |
| C  | 8.51528361856664 | 2.27822905624777  | 3.95810078705594  |
| H  | 8.77997346684911 | 2.16256572020743  | 2.91134116573096  |
| H  | 7.90824049193178 | 1.43695965103324  | 4.28526691919599  |
| C  | 6.42771052234496 | 7.29621571859379  | 2.10433166510188  |
| C  | 7.70062954999153 | 7.10398932677531  | 1.56318934357196  |
| H  | 8.41474181995112 | 6.45926440049734  | 2.05095283710266  |
| C  | 8.09920385009982 | 7.76149080421649  | 0.41157862889282  |
| H  | 9.08644772335635 | 7.59409715175729  | 0.00109329423895  |
| C  | 7.23795132077065 | 8.65689599585722  | -0.22603700919882 |
| C  | 5.97563498459542 | 8.88705362765938  | 0.31968041555858  |
| H  | 5.29127457739065 | 9.59000893689969  | -0.13100717805591 |
| C  | 5.59460798779332 | 8.22015050510728  | 1.47699495683210  |
| H  | 4.63264725332776 | 8.46513429231236  | 1.90138843780292  |
| C  | 6.82118955305164 | 10.13302116272104 | -2.05262250283886 |
| H  | 5.94733021275588 | 9.58492039424248  | -2.41185673815096 |
| H  | 7.38919634016253 | 10.51206645578740 | -2.89873056851494 |
| H  | 6.49982980941594 | 10.96977142846468 | -1.42844351341110 |
| C  | 1.00986019453147 | 5.92262214908891  | 2.96731103519813  |
| H  | 0.95539708656678 | 6.16101048259560  | 1.90867881230797  |
| H  | 0.43169197567885 | 6.64532560861992  | 3.53876657344349  |
| N  | 7.73383994984420 | 5.87502075049701  | 9.67277218549621  |
| N  | 7.53122359110152 | 5.97072772802546  | 8.35979606906144  |
| N  | 6.29569191659102 | 5.57178792489784  | 8.15471142984799  |
| N  | 4.36066615002721 | 3.94981074085134  | 6.96698441362872  |
| N  | 4.08039162533925 | 2.91347467006671  | 6.21220593235669  |
| N  | 3.56424648538291 | 1.99581963310655  | 7.03180460947632  |
| N  | 3.77263561278973 | 6.54845722857336  | 7.68608894531531  |
| N  | 3.10826802099733 | 7.65887701918745  | 7.47816447695702  |
| N  | 2.39897962277978 | 7.87173175271573  | 8.58056204443110  |
| O  | 2.65056232024203 | 2.09888351519152  | 14.10983439688004 |
| C  | 6.64083522907793 | 5.41097371874234  | 10.31403223159549 |
| H  | 6.61734927561127 | 5.27981421526591  | 11.37980631122288 |

|   |                  |                   |                   |
|---|------------------|-------------------|-------------------|
| C | 5.70927023747987 | 5.19568799654674  | 9.32921430205611  |
| C | 4.24250440806038 | 4.76772714937763  | 9.34130920304719  |
| C | 4.02856201097278 | 3.70958981633987  | 8.26439881304289  |
| C | 3.51090691787309 | 2.43793802387558  | 8.30643446668014  |
| H | 3.12618981587468 | 1.83566463304375  | 9.10841620307141  |
| C | 3.15799327980276 | 0.69910552296687  | 6.50681121774008  |
| H | 2.71918681712966 | 0.12604635649099  | 7.31849295673701  |
| H | 4.02827141673167 | 0.17973277010933  | 6.10979677225185  |
| C | 3.48434884251770 | 6.02697064468940  | 8.91938887459342  |
| C | 2.59721634832828 | 6.90367945164700  | 9.50061298745539  |
| H | 2.11463447243445 | 6.93602691846268  | 10.45848840767625 |
| C | 1.50978929815525 | 9.02135044286655  | 8.64812774299144  |
| H | 0.62888099596173 | 8.83498597257073  | 8.03606821874788  |
| H | 1.21607016272990 | 9.17169662984817  | 9.68257744132311  |
| C | 3.83852992208638 | 4.13998886252068  | 10.67383303454387 |
| C | 2.56306106838150 | 4.28289890434852  | 11.22099263418828 |
| H | 1.82330979290027 | 4.90559909861514  | 10.74328831828499 |
| C | 2.19481436424334 | 3.59996720415552  | 12.36903871255283 |
| H | 1.20428750276696 | 3.72731106315023  | 12.78600646251651 |
| C | 3.09074694720300 | 2.72925673071021  | 12.99268661596031 |
| C | 4.35727448666815 | 2.54743197899930  | 12.43744526681848 |
| H | 5.06848398152492 | 1.86530178485559  | 12.87828595948206 |
| C | 4.70836751900832 | 3.23993422704214  | 11.28669553815138 |
| H | 5.68103037400574 | 3.04511002971747  | 10.85806102355209 |
| C | 3.56353331546352 | 1.22633254093374  | 14.78379058385418 |
| H | 4.43351655305467 | 1.77866547406163  | 15.14558802678408 |
| H | 3.01337146995823 | 0.81528860880955  | 15.62673689781290 |
| H | 3.88942247777495 | 0.41189393285447  | 14.13275027696217 |
| C | 9.03049120779133 | 6.20690326637171  | 10.24800447752490 |
| H | 9.62429169586216 | 6.68756705790450  | 9.47585732249378  |
| H | 9.52252179258204 | 5.29908171369802  | 10.59228510046804 |
| H | 6.35903319179786 | 11.32338829033215 | 6.59355253193763  |
| H | 9.41723538873555 | 2.34521575440494  | 4.56312931152954  |
| H | 0.63008663430671 | 4.91891820970423  | 3.14874581845151  |
| H | 2.42300805894984 | 0.84465913124322  | 5.71822943088348  |
| H | 2.04297746874218 | 9.89412099870920  | 8.27911421156653  |
| H | 8.88645108607325 | 6.88864965871799  | 11.08291282870234 |

**Table S1.** Selected TDDFT transitions for **Fe** and their dominant composition and character.

| State           | Energy /<br>cm <sup>-1</sup> | $\lambda$ /<br>nm | $f(\text{osc})$ | Composition                                                             | Character                                           |
|-----------------|------------------------------|-------------------|-----------------|-------------------------------------------------------------------------|-----------------------------------------------------|
| S <sub>1</sub>  | 21224                        | 471               | 0.000416        | HOMO→LUMO+10 (27 %)<br>HOMO-1→LUMO+10 (13 %)                            | <sup>1</sup> MC                                     |
| S <sub>8</sub>  | 29259                        | 342               | 0.0106          | HOMO→LUMO (46 %)<br>HOMO-1→LUMO (16 %)                                  | <sup>1</sup> MLCT (tz)                              |
| S <sub>9</sub>  | 29616                        | 338               | 0.0202          | HOMO-1→LUMO (32 %)<br>HOMO→LUMO+1 (29 %)                                | <sup>1</sup> MLCT (tz)                              |
| S <sub>10</sub> | 29869                        | 335               | 0.0587          | HOMO-1→LUMO+1 (31 %)<br>HOMO→LUMO (25 %)<br>HOMO-1→LUMO (17 %)          | <sup>1</sup> MLCT (tz)                              |
| S <sub>11</sub> | 30710                        | 326               | 0.149           | HOMO→LUMO+1 (31 %)<br>HOMO-1→LUMO+1 (28 %)<br>HOMO-1→LUMO (14 %)        | <sup>1</sup> MLCT (tz)                              |
| S <sub>12</sub> | 31005                        | 323               | 0.0294          | HOMO-1→LUMO+2 (29 %)<br>HOMO→LUMO+3 (28 %)<br>HOMO-2→LUMO+2 (14 %)      | <sup>1</sup> MLCT (tz)                              |
| S <sub>14</sub> | 32020                        | 312               | 0.0476          | HOMO→LUMO+4 (38 %)<br>HOMO-1→LUMO+4 (37 %)<br>HOMO-2→LUMO (16 %)        | <sup>1</sup> MLCT (tz)                              |
| S <sub>15</sub> | 32188                        | 311               | 0.0114          | HOMO-2→LUMO (72 %)                                                      | <sup>1</sup> MLCT (tz)                              |
| S <sub>16</sub> | 32424                        | 308               | 0.0758          | HOMO-1→LUMO+4 (47 %)<br>HOMO→LUMO+4 (42 %)                              | <sup>1</sup> MLCT (tz)                              |
| S <sub>25</sub> | 36048                        | 277               | 0.0201          | HOMO-4→LUMO (52 %)<br>HOMO-3→LUMO (16 %)<br>HOMO→LUMO+6 (11 %)          | <sup>1</sup> ILCT (An→tz)<br><sup>1</sup> MLCT (An) |
| S <sub>27</sub> | 36127                        | 277               | 0.0111          | HOMO-1→LUMO+6 (71 %)<br>HOMO→LUMO+6 (22 %)                              | <sup>1</sup> MLCT (An)                              |
| S <sub>37</sub> | 37550                        | 266               | 0.0454          | HOMO-1→LUMO+8 (44 %)<br>HOMO→LUMO+8 (28 %)                              | <sup>1</sup> MLCT (An)                              |
| S <sub>51</sub> | 39870                        | 251               | 0.0504          | HOMO-1→LUMO+14 (66 %)<br>HOMO→LUMO+14 (28 %)                            | <sup>1</sup> MLCT (tz)                              |
| S <sub>52</sub> | 40228                        | 249               | 0.0144          | HOMO-3→LUMO+5 (48 %)<br>HOMO-4→LUMO+6 (52 %)                            | <sup>1</sup> ILCT (An→tz)<br><sup>1</sup> LC (An)   |
| S <sub>89</sub> | 45028                        | 222               | 0.0471          | HOMO-5→LUMO+4 (77 %)                                                    | <sup>1</sup> ILCT (An→tz)<br><sup>1</sup> LC (tz)   |
| S <sub>98</sub> | 46212                        | 216               | 0.0208          | HOMO-5→LUMO+5 (30 %)<br>HOMO-8→LUMO+4 (28 %)<br>HOMO-7→LUMO+4 (13 %)    | <sup>1</sup> LC                                     |
| S <sub>99</sub> | 46288                        | 216               | 0.143           | HOMO-7→LUMO+4 (37 %)<br>HOMO-6→LUMO+5 (11 %)<br>HOMO-3→LUMO+9 (77 %)    | <sup>1</sup> LC                                     |
| T <sub>1</sub>  | 15587                        | 642               | -               | HOMO→LUMO+10 (35 %)<br>HOMO-1→LUMO+10 (13 %)                            | <sup>3</sup> MC                                     |
| T <sub>2</sub>  | 16165                        | 619               | -               | HOMO-2→LUMO+10 (27 %)                                                   | <sup>3</sup> MC                                     |
| T <sub>3</sub>  | 16268                        | 615               | -               | HOMO-1→LUMO+11 (17 %)<br>HOMO-1→LUMO+12 (17 %)<br>HOMO-1→LUMO+13 (16 %) | <sup>3</sup> MC                                     |
| T <sub>7</sub>  | 26288                        | 380               | -               | HOMO→LUMO+3 (32 %)<br>HOMO-1→LUMO+2 (31 %)<br>HOMO-1→LUMO+1 (15 %)      | <sup>3</sup> MLCT                                   |

**Table S2.** Selected TDDFT transitions for **Ru** and their dominant composition and character.

| State           | Energy /<br>cm <sup>-1</sup> | $\lambda$ /<br>nm | $f(\text{osc})$ | Composition                                                                                  | Character                                           |
|-----------------|------------------------------|-------------------|-----------------|----------------------------------------------------------------------------------------------|-----------------------------------------------------|
| S <sub>1</sub>  | 29178                        | 343               | 0.0107          | HOMO→LUMO (72 %)                                                                             | <sup>1</sup> MLCT (tz)                              |
| S <sub>2</sub>  | 29885                        | 335               | 0.0268          | HOMO-1→LUMO+1 (17 %)<br>HOMO-1→LUMO (34 %)<br>HOMO→LUMO+1 (24 %)                             | <sup>1</sup> MLCT (tz)                              |
| S <sub>3</sub>  | 30173                        | 331               | 0.0915          | HOMO-1→LUMO+1 (38 %)<br>HOMO-1→LUMO (28 %)<br>HOMO→LUMO (20 %)                               | <sup>1</sup> MLCT (tz)                              |
| S <sub>4</sub>  | 31051                        | 322               | 0.0933          | HOMO→LUMO+2 (36 %)<br>HOMO→LUMO+1 (26 %)<br>HOMO-1→LUMO (11 %)                               | <sup>1</sup> MLCT (tz + An)                         |
| S <sub>5</sub>  | 31627                        | 316               | 0.192           | HOMO→LUMO+1 (36 %)<br>HOMO→LUMO+2 (28 %)<br>HOMO-1→LUMO (14 %)                               | <sup>1</sup> MLCT (tz + An)                         |
| S <sub>6</sub>  | 32007                        | 312               | 0.0329          | HOMO-1→LUMO+2 (45 %)<br>HOMO-1→LUMO+4 (30 %)                                                 | <sup>1</sup> MLCT (tz + An)                         |
| S <sub>8</sub>  | 32763                        | 305               | 0.0984          | HOMO→LUMO+3 (61 %)<br>HOMO→LUMO+4 (11 %)                                                     | <sup>1</sup> MLCT (tz)                              |
| S <sub>9</sub>  | 33233                        | 301               | 0.12            | HOMO-1→LUMO+3 (53 %)<br>HOMO-1→LUMO+4 (24 %)<br>HOMO→LUMO+3 (10 %)                           | <sup>1</sup> MLCT (tz)                              |
| S <sub>11</sub> | 33844                        | 296               | 0.0133          | HOMO-1→LUMO+5 (16 %)<br>HOMO-3→LUMO+1 (14 %)                                                 | <sup>1</sup> MLCT (tz)<br><sup>1</sup> ILCT (An→tz) |
| S <sub>21</sub> | 37512                        | 267               | 0.0235          | HOMO→LUMO+6 (38 %)<br>HOMO-1→LUMO+6 (27 %)<br>HOMO-2→LUMO (12 %)                             | <sup>1</sup> MLCT (An)                              |
| S <sub>22</sub> | 37533                        | 266               | 0.022           | HOMO→LUMO+6 (40 %)<br>HOMO-1→LUMO+6 (38 %)                                                   | <sup>1</sup> MLCT (An)                              |
| S <sub>24</sub> | 37722                        | 265               | 0.0102          | HOMO-4→LUMO (38 %)<br>HOMO-3→LUMO (30 %)                                                     | <sup>1</sup> MLCT (tz)<br><sup>1</sup> ILCT (An→tz) |
| S <sub>28</sub> | 38009                        | 263               | 0.0121          | HOMO-2→LUMO+1 (49 %)<br>HOMO-4→LUMO+1 (16 %)                                                 | <sup>1</sup> MLCT (tz)<br><sup>1</sup> ILCT (An→tz) |
| S <sub>30</sub> | 38603                        | 259               | 0.0572          | HOMO-1→LUMO+8 (48 %)<br>HOMO-1→LUMO+10 (24 %)<br>HOMO→LUMO+8 (14 %)                          | <sup>1</sup> MLCT (An + tz)                         |
| S <sub>44</sub> | 40763                        | 245               | 0.0761          | HOMO→LUMO+12 (43 %)<br>HOMO-1→LUMO+12 (36 %)                                                 | <sup>1</sup> MLCT (tz)                              |
| S <sub>57</sub> | 43970                        | 227               | 0.0119          | HOMO-5→LUMO (86 %)                                                                           | <sup>1</sup> ILCT (An→tz)<br><sup>1</sup> LC (tz)   |
| S <sub>77</sub> | 46557                        | 215               | 0.0139          | HOMO-6→LUMO+2 (28 %)<br>HOMO-5→LUMO+3 (14 %)<br>HOMO-8→LUMO+2 (11 %)                         | <sup>1</sup> LC                                     |
| S <sub>82</sub> | 46840                        | 214               | 0.0311          | HOMO-5→LUMO+3 (50 %)<br>HOMO-6→LUMO+2 (16 %)                                                 | <sup>1</sup> LC                                     |
| S <sub>87</sub> | 47249                        | 212               | 0.0561          | HOMO-1→LUMO+16 (16 %)<br>HOMO→LUMO+16 (19 %)<br>HOMO-1→LUMO+17 (16 %)<br>HOMO→LUMO+17 (16 %) | <sup>1</sup> MC                                     |
| S <sub>88</sub> | 47280                        | 212               | 0.236           | HOMO-8→LUMO+2 (17 %)<br>HOMO-2→LUMO+9 (16 %)                                                 | <sup>1</sup> LC                                     |
| S <sub>89</sub> | 47402                        | 211               | 0.0295          | HOMO-9→LUMO (27 %)<br>HOMO-6→LUMO+3 (16 %)                                                   | <sup>1</sup> LC                                     |
| S <sub>91</sub> | 47614                        | 210               | 0.0663          | HOMO-6→LUMO+4 (48 %)                                                                         | <sup>1</sup> LC/ <sup>1</sup> ILCT                  |

|                 |       |     |        |                                                                                                                      |                        |
|-----------------|-------|-----|--------|----------------------------------------------------------------------------------------------------------------------|------------------------|
| S <sub>92</sub> | 47921 | 209 | 0.0795 | HOMO-8→LUMO+2 (24 %)<br>HOMO-7→LUMO+3 (17 %)<br>HOMO-6→LUMO+4 (14 %)<br>HOMO-6→LUMO+2 (12 %)<br>HOMO-6→LUMO+5 (16 %) | <sup>1</sup> LC        |
| S <sub>94</sub> | 48102 | 208 | 0.0184 | HOMO-7→LUMO+3 (22 %)<br>HOMO-8→LUMO+3 (17 %)                                                                         | <sup>1</sup> LC        |
| S <sub>97</sub> | 48324 | 207 | 0.0311 | HOMO-7→LUMO+3 (16 %)<br>HOMO-7→LUMO+3 (30 %)<br>HOMO-8→LUMO+3 (20 %)                                                 | <sup>1</sup> LC        |
| T <sub>1</sub>  | 26830 | 373 |        | HOMO-1→LUMO (62 %)<br>HOMO→LUMO+1 (13 %)                                                                             | <sup>3</sup> MLCT (tz) |
| T <sub>2</sub>  | 27215 | 367 |        | HOMO→LUMO+1 (39 %)<br>HOMO→LUMO (29 %)                                                                               | <sup>3</sup> MLCT (tz) |
| T <sub>3</sub>  | 27171 | 368 |        | HOMO-1→LUMO+1 (21 %)<br>HOMO→LUMO (35 %)<br>HOMO→LUMO+1 (25 %)                                                       | <sup>3</sup> MLCT (tz) |
| T <sub>4</sub>  | 27418 | 365 |        | HOMO-1→LUMO (13 %)<br>HOMO-1→LUMO+2 (32 %)                                                                           | <sup>3</sup> MLCT (tz) |
| T <sub>5</sub>  | 28874 | 346 |        | HOMO→LUMO+4 (22 %)<br>HOMO→LUMO+3 (12 %)<br>HOMO-1→LUMO+1 (10 %)                                                     | <sup>3</sup> MLCT (tz) |

**Table S3.** Selected TDDFT transitions for **Os** and their dominant composition and character.

| State           | Energy /<br>cm <sup>-1</sup> | $\lambda$ /<br>nm | $f(\text{osc})$ | Composition           | Character                   |
|-----------------|------------------------------|-------------------|-----------------|-----------------------|-----------------------------|
| S <sub>1</sub>  | 26047                        | 384               | 0.00783         | HOMO→LUMO (73 %)      | <sup>1</sup> MLCT (tz)      |
| S <sub>2</sub>  | 26839                        | 373               | 0.0285          | HOMO-1→LUMO+1 (21 %)  | <sup>1</sup> MLCT (tz)      |
|                 |                              |                   |                 | HOMO-1→LUMO (24 %)    |                             |
| S <sub>3</sub>  | 27331                        | 366               | 0.0847          | HOMO→LUMO+1 (18 %)    | <sup>1</sup> MLCT (tz)      |
|                 |                              |                   |                 | HOMO-1→LUMO (34 %)    |                             |
|                 |                              |                   |                 | HOMO-1→LUMO+1 (24 %)  |                             |
|                 |                              |                   |                 | HOMO→LUMO (13 %)      |                             |
| S <sub>4</sub>  | 29058                        | 344               | 0.278           | HOMO→LUMO+1 (20 %)    | <sup>1</sup> MLCT (tz)      |
|                 |                              |                   |                 | HOMO-1→LUMO (23 %)    |                             |
| S <sub>5</sub>  | 29545                        | 339               | 0.129           | HOMO→LUMO+3 (22 %)    | <sup>1</sup> MLCT (tz)      |
|                 |                              |                   |                 | HOMO→LUMO+2 (21 %)    |                             |
|                 |                              |                   |                 | HOMO→LUMO+1 (20 %)    |                             |
| S <sub>6</sub>  | 30199                        | 331               | 0.0704          | HOMO-1→LUMO+2 (29 %)  | <sup>1</sup> MLCT (tz)      |
|                 |                              |                   |                 | HOMO→LUMO+2 (21 %)    |                             |
|                 |                              |                   |                 | HOMO→LUMO+4 (17 %)    |                             |
|                 |                              |                   |                 | HOMO-1→LUMO+3 (21 %)  |                             |
| S <sub>7</sub>  | 30252                        | 331               | 0.119           | HOMO→LUMO+3 (29 %)    | <sup>1</sup> MLCT (tz)      |
|                 |                              |                   |                 | HOMO-1→LUMO+3 (22 %)  |                             |
|                 |                              |                   |                 | HOMO→LUMO+2 (14 %)    |                             |
| S <sub>8</sub>  | 30410                        | 329               | 0.0396          | HOMO-1→LUMO+4 (43 %)  | <sup>1</sup> MLCT (tz)      |
|                 |                              |                   |                 | HOMO→LUMO+2 (16 %)    |                             |
|                 |                              |                   |                 | HOMO-1→LUMO+2 (14 %)  |                             |
| S <sub>9</sub>  | 30698                        | 326               | 0.0132          | HOMO-2→LUMO (82 %)    | <sup>1</sup> MLCT (tz)      |
| S <sub>10</sub> | 30879                        | 324               | 0.139           | HOMO-1→LUMO+2 (30 %)  | <sup>1</sup> MLCT (tz)      |
|                 |                              |                   |                 | HOMO-1→LUMO+2 (24 %)  |                             |
|                 |                              |                   |                 | HOMO-1→LUMO+4 (23 %)  |                             |
| S <sub>17</sub> | 34861                        | 287               | 0.0197          | HOMO→LUMO+6 (76 %)    | <sup>1</sup> MLCT (An)      |
| S <sub>18</sub> | 34924                        | 286               | 0.0188          | HOMO-1→LUMO+6 (87 %)  | <sup>1</sup> MLCT (An)      |
| S <sub>23</sub> | 36026                        | 278               | 0.0717          | HOMO-1→LUMO+8 (60 %)  | <sup>1</sup> MLCT (An + tz) |
|                 |                              |                   |                 | HOMO-1→LUMO+10 (24 %) |                             |
| S <sub>29</sub> | 37072                        | 270               | 0.0178          | HOMO-3→LUMO (53 %)    | <sup>1</sup> ILCT (An→tz)   |
|                 |                              |                   |                 | HOMO-4→LUMO (10 %)    |                             |
| S <sub>35</sub> | 38034                        | 263               | 0.0177          | HOMO→LUMO+13 (31 %)   | <sup>1</sup> MLCT (tz)      |
|                 |                              |                   |                 | HOMO→LUMO+12 (24 %)   |                             |
|                 |                              |                   |                 | HOMO-1→LUMO+12 (20 %) |                             |
|                 |                              |                   |                 | HOMO→LUMO+11 (15 %)   |                             |
| S <sub>36</sub> | 38150                        | 262               | 0.069           | HOMO-1→LUMO+13 (31 %) | <sup>1</sup> MLCT (tz)      |
|                 |                              |                   |                 | HOMO→LUMO+11 (29 %)   |                             |
|                 |                              |                   |                 | HOMO-1→LUMO+12 (18 %) |                             |
|                 |                              |                   |                 | HOMO-1→LUMO+11 (11 %) |                             |
|                 |                              |                   |                 | HOMO→LUMO+13 (43 %)   |                             |
| S <sub>37</sub> | 38226                        | 262               | 0.0215          | HOMO→LUMO+13 (19 %)   | <sup>1</sup> MLCT (tz)      |
|                 |                              |                   |                 | HOMO-1→LUMO+13 (43 %) |                             |
| S <sub>42</sub> | 40439                        | 247               | 0.0119          | HOMO-3→LUMO+2 (54 %)  | <sup>1</sup> ILCT (An→tz)   |
|                 |                              |                   |                 | HOMO-3→LUMO+3 (15 %)  |                             |
|                 |                              |                   |                 | HOMO-4→LUMO+2 (15 %)  |                             |
| S <sub>58</sub> | 43427                        | 230               | 0.0105          | HOMO-5→LUMO (71 %)    | <sup>1</sup> ILCT (An→tz)   |
| S <sub>62</sub> | 43893                        | 228               | 0.0122          | HOMO-5→LUMO+1 (75 %)  | <sup>1</sup> ILCT (An→tz)   |
|                 |                              |                   |                 | HOMO-7→LUMO+1 (14 %)  |                             |
| S <sub>77</sub> | 46444                        | 215               | 0.0147          | HOMO-5→LUMO+3 (54 %)  | <sup>1</sup> ILCT (An→tz)   |
| S <sub>79</sub> | 46707                        | 214               | 0.0536          |                       | <sup>1</sup> LC             |
|                 |                              |                   |                 | HOMO-4→LUMO+11 (24 %) | <sup>1</sup> ILCT (An→tz)   |

|                 |       |     |        |                                                                                                                        |                        |
|-----------------|-------|-----|--------|------------------------------------------------------------------------------------------------------------------------|------------------------|
| S <sub>81</sub> | 46843 | 214 | 0.0625 | HOMO-4→LUMO+8 (18 %)<br>HOMO-3→LUMO+11 (15 %)<br>HOMO-6→LUMO+3 (24 %)<br>HOMO-3→LUMO+8 (20 %)<br>HOMO-3→LUMO+10 (12 %) | <sup>1</sup> LC        |
| S <sub>82</sub> | 46887 | 213 | 0.033  | HOMO-6→LUMO+2 (45 %)                                                                                                   | <sup>1</sup> LC        |
| S <sub>83</sub> | 46923 | 213 | 0.0336 | HOMO-9→LUMO (51 %)                                                                                                     | <sup>1</sup> LC        |
| S <sub>84</sub> | 47012 | 213 | 0.021  | HOMO-3→LUMO+9 (15 %)<br>HOMO-3→LUMO+11 (31 %)<br>HOMO-3→LUMO+9 (22 %)<br>HOMO-9→LUMO (12 %)<br>HOMO-3→LUMO+13 (11 %)   | <sup>1</sup> LC        |
| S <sub>86</sub> | 47332 | 211 | 0.0679 | HOMO-7→LUMO+2 (18 %)                                                                                                   | <sup>1</sup> LC        |
| S <sub>87</sub> | 47380 | 211 | 0.0435 | HOMO→LUMO+18 (41 %)                                                                                                    | <sup>1</sup> LC        |
| S <sub>88</sub> | 47420 | 211 | 0.0364 | HOMO→LUMO+16 (45 %)                                                                                                    | <sup>1</sup> LC        |
| S <sub>89</sub> | 47495 | 211 | 0.0873 | HOMO→LUMO+18 (30 %)<br>HOMO-1→LUMO+18 (24 %)<br>HOMO-8→LUMO+2 (11 %)                                                   | <sup>1</sup> LC        |
| S <sub>90</sub> | 47536 | 210 | 0.0189 | HOMO-1→LUMO+18 (35 %)<br>HOMO→LUMO+16 (16 %)<br>HOMO-8→LUMO+4 (16 %)                                                   | <sup>1</sup> LC        |
| S <sub>92</sub> | 47633 | 210 | 0.0122 | HOMO-1→LUMO+16 (53 %)<br>HOMO-10→LUMO (15 %)<br>HOMO→LUMO+16 (12 %)                                                    | <sup>1</sup> LC        |
| S <sub>93</sub> | 47686 | 210 | 0.0164 | HOMO-8→LUMO+3 (19 %)<br>HOMO-11→LUMO (17 %)<br>HOMO-7→LUMO+3 (10 %)                                                    | <sup>1</sup> LC        |
| S <sub>94</sub> | 47714 | 210 | 0.0135 | HOMO-10→LUMO (58 %)                                                                                                    | <sup>1</sup> LC        |
| S <sub>96</sub> | 47966 | 209 | 0.0225 | HOMO-6→LUMO+4 (47 %)                                                                                                   | <sup>1</sup> LC        |
| T <sub>1</sub>  | 23802 | 420 | -      | HOMO-1→LUMO (70 %)<br>HOMO→LUMO+1 (20 %)                                                                               | <sup>3</sup> MLCT (tz) |
| T <sub>2</sub>  | 24062 | 416 | -      | HOMO→LUMO+1 (45 %)<br>HOMO→LUMO (27 %)<br>HOMO-1→LUMO+1 (17 %)                                                         | <sup>3</sup> MLCT (tz) |
| T <sub>3</sub>  | 24377 | 410 | -      | HOMO→LUMO (44 %)<br>HOMO→LUMO+1 (26 %)<br>HOMO-1→LUMO (16 %)                                                           | <sup>3</sup> MLCT (tz) |
| T <sub>4</sub>  | 25545 | 392 | -      | HOMO-1→LUMO+1 (60 %)<br>HOMO→LUMO (20 %)                                                                               | <sup>3</sup> MLCT (tz) |
| T <sub>5</sub>  | 26302 | 380 | -      | HOMO-1→LUMO+3 (23 %)<br>HOMO→LUMO+4 (18 %)<br>HOMO-1→LUMO+2 (11 %)                                                     | <sup>3</sup> MLCT (tz) |



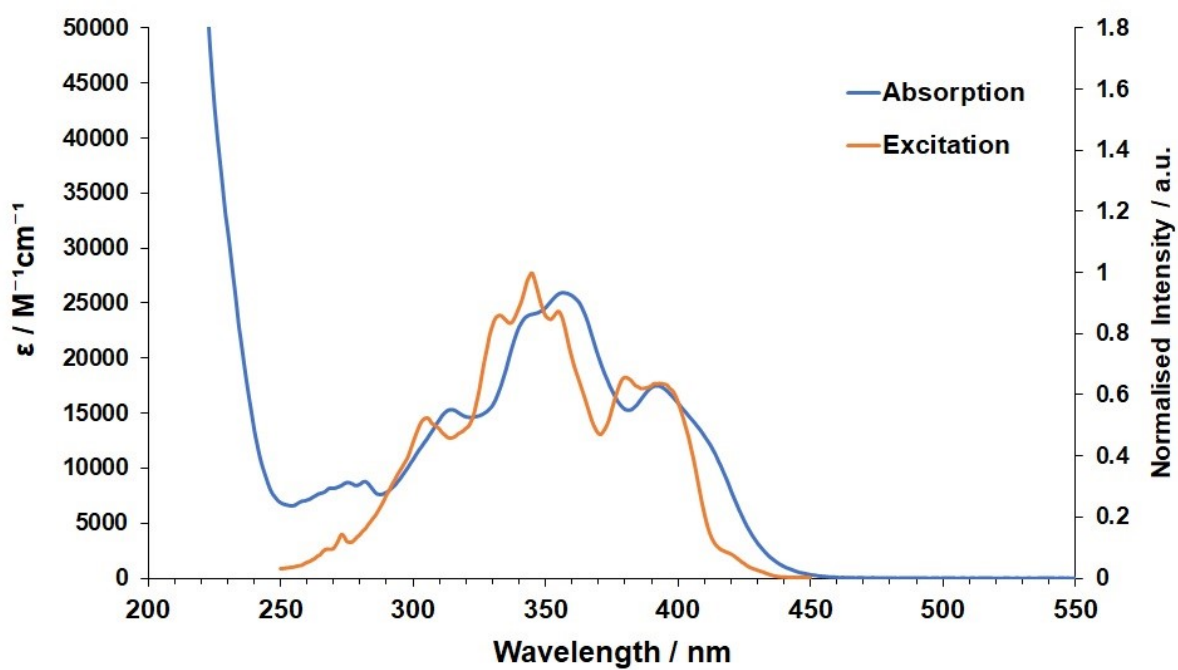

**Fig. S19.** Overlaid electronic absorption profile recorded for a room temperature MeCN solution of **Os** (blue) and excitation profile corresponding to luminescence at  $\lambda_{\text{max}} = 472$  nm, recorded in a 4:1 EtOH/MeOH solvent glass at 77 K (orange).
